# Supplementary material
Source: PubMed Central journal article supplement (PMC6704743)
Supplement: jamasurg-154-e193019-s001.pdf [file jamasurg-154-e193019-s001.pdf]

## Supplementary Online Content

Bateni SB, Gingrich AA, Hoch JS, Canter RJ, Bold RJ. Defining value for pancreatic surgery in early-stage pancreatic cancer. *JAMA Surg*. Published online August 21, 2019. doi: 10.1001/jamasurg.2019.3019

**eTable.** Site and Histology Codes for Pancreatic Adenocarcinoma

This supplementary material has been provided by the authors to give readers additional information about their work.

eTable. Site and Histology Codes for Pancreatic Adenocarcinoma

|                 |                                                                                                      |
|-----------------|------------------------------------------------------------------------------------------------------|
| Site Codes      | C250-259                                                                                             |
| Histology Codes | 8000, 8010, 8020, 8050, 8140, 8141, 8144, 8210, 8211, 8255, 8260, 8261, 8262, 8263, 8490, 8500, 8560 |
